# Supplementary material for: Latent traits of lung tissue patterns in former smokers derived by dual channel deep learning in computed tomography images
Source: PubMed Central journal article supplement (PMC7921389; doi:10.1038/s41598-021-84547-5), 2021-03-01
Supplement: 41598_2021_84547_MOESM1_ESM.pdf [file 41598_2021_84547_MOESM1_ESM.pdf]

## Supplementary Materials:

### Latent Traits of Lung Tissue Patterns in Former Smokers derived by

#### Dual Channel Deep Learning in Computed Tomography Images

Frank Li, Jiwoong Choi, Chunrui Zou, John D. Newell Jr, Alejandro P. Comellas, Chang Hyun Lee, Hongseok Ko, R. Graham Barr, Eugene R. Bleecker, Christopher B. Cooper, Fereidoun Abtin, Igor Barjaktarevic, David Couper, MeiLan Han, Nadia N. Hansel, Richard E. Kanner, Robert Paine III, Ella A. Kazerooni, Fernando J. Martinez, Wanda O'Neal, Stephen I Rennard, Benjamin M. Smith, Prescott G Woodruff, Eric A. Hoffman, and Ching-Long Lin

#### Feature Constructor

The feature constructor consists of the following six layers (**Figure E 1**).

1. a softmax layer, taking the embedding as an input,
2. a threshold ReLU layer, suppressing the small output (i.e. value less than 1 divided by the number of pattern-clusters) of the softmax layer,
3. an amplifier, multiplying the output of the threshold ReLU layer by approximately the number of pattern-clusters,
4. a sigmoid layer, taking the output of the threshold ReLU layer as an input,
5. a threshold ReLU layer, suppressing the activations less than 0.5, and
6. a multiplication layer, multiplying the embeddings by the suppressed activations.

The embedding from the encoder was input to the FC and the activation-regulated embedding was then output to the decoder. The second threshold ReLU layer served as a classifier to group the

ROIs into different pattern-clusters. The maximum activation in the second threshold ReLU layer was chosen to be the membership of the pattern-clusters. The model was developed by using Python (version 3.6) and Tensorflow with Keras API (version 1.14.0).

### **Steps of Exploratory Factor Analysis**

The first step is factor extraction. We used principal axis factoring (PAF)<sup>1</sup> as our feature extraction method. It decomposes the correlation matrix of the observed variables to obtain the eigenvalues and eigenvectors, which represent the magnitude and directions of the new feature space, respectively. PAF assumes that the total variance of the observed variables is a combination of common variance and unique variance. Common variance is the variance that is shared among the observed variables while unique variance is the variance that is not shared in common (e.g. noise). PAF is similar to principal component analysis (PCA), but it accounts for the unique variance of each variable while PCA does not.

The second step is factor rotation. The purpose of factor rotation is to obtain a simple structure for easier interpretation of the extracted factors. A simple structure means that each variable has high loadings on one factor only and each factor has high loadings for only some of the variables. Without rotation, the first factor will be the most general factor that most variables load onto and will explain the largest amount of variance, making it difficult to interpret. We used the OBLIMIN method, an oblique rotation method allowing correlations among factors, to rotate the extracted factors<sup>1</sup>. After factor rotation, we obtained a pattern matrix and a structure matrix. Coefficients of the pattern matrix reflect the unique factor loadings (similar to partial standardized regression coefficients), while the structure matrix contains correlations between factors and variables.

Finally, we calculated the factor scores ( $F_s$ ) using **Equation (E1)** and **Equation (E2)** based on Thurstone's approach <sup>2</sup> for the future predictions of PFT measures or other clinical variables.

$$F_s = XW \quad (\mathbf{E1})$$

$$W = R^{-1}S = R^{-1}P\emptyset \quad (\mathbf{E2})$$

where  $X$  is the standardized pattern-histogram,  $W$  contains the regression weights,  $R$  is the correlation matrix of the pattern-histogram,  $S$  is the structure matrix,  $P$  is the pattern matrix, and  $\emptyset$  is the correlation matrix of the factors. EFA was performed using R software (version 3.5.3) with the psych package (version 1.8.12).

### **Testing the efficacy of the feature constructor**

We trained a 2D CAE-FC model with 10 embeddings, which has the same network structure with the 3D CAE-FC, using the MNIST dataset. The 2D CAE-FC model was able to group similar digits into the same pattern-clusters as show in **Figure E 2**. The percentages of each number in each cluster were shown in **Table E 1**.

## Supplementary Figures

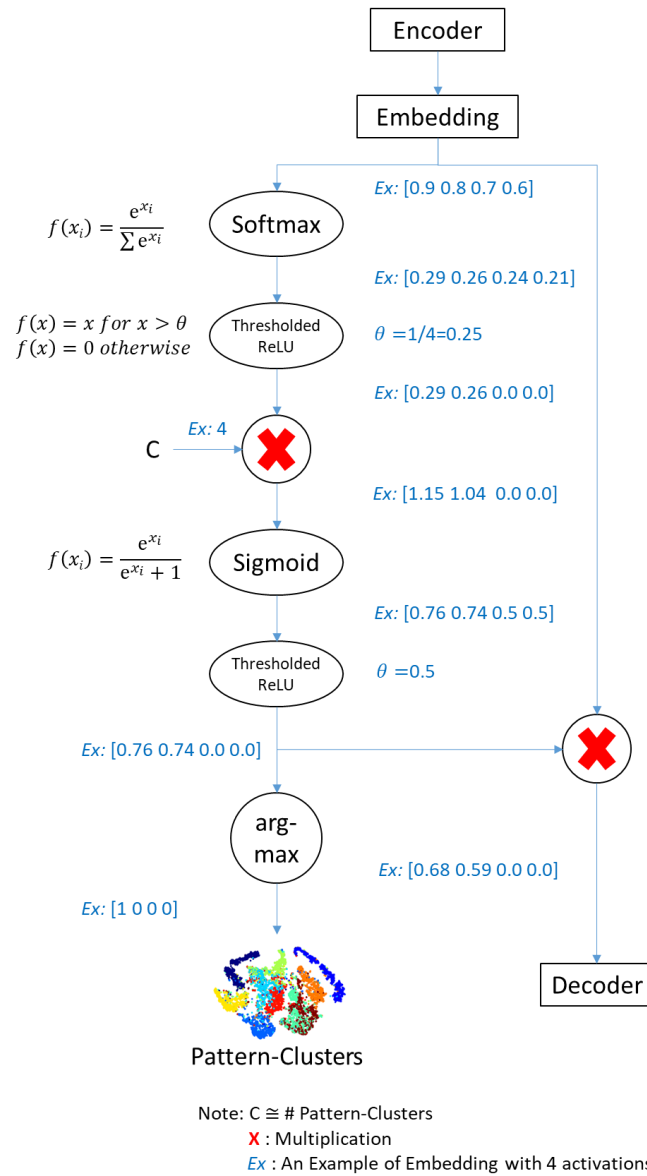

**Figure E 1.** The structure of the feature constructor. It takes the embedding as input and assigns the membership of pattern-cluster to each ROI. The softmax layer normalizes the embedding vector into a probability distribution between zero and one. It is considered as a soft version of the argmax function. Subsequently, the first threshold ReLU layer suppresses the activations smaller than the average probability (i.e. one divided by the number of activations). The output of the threshold ReLU layer is then multiplied by an arbitrary number (e.g. number of activations from the embedding), so that it is greater than one. Next, each activation from the last layer is normalized by the sigmoid layer and is clipped by the second threshold ReLU layer to remove the values less than or equal to 0.5. Through the steps above, we are able to obtain a vector with only important activations remaining. Lastly, the activations of the embedding are multiplied by the vector to enlarge the differences between the largest activations and other activations. The adjusted activations of the embedding are used by the decoder to reconstruct the ROIs.

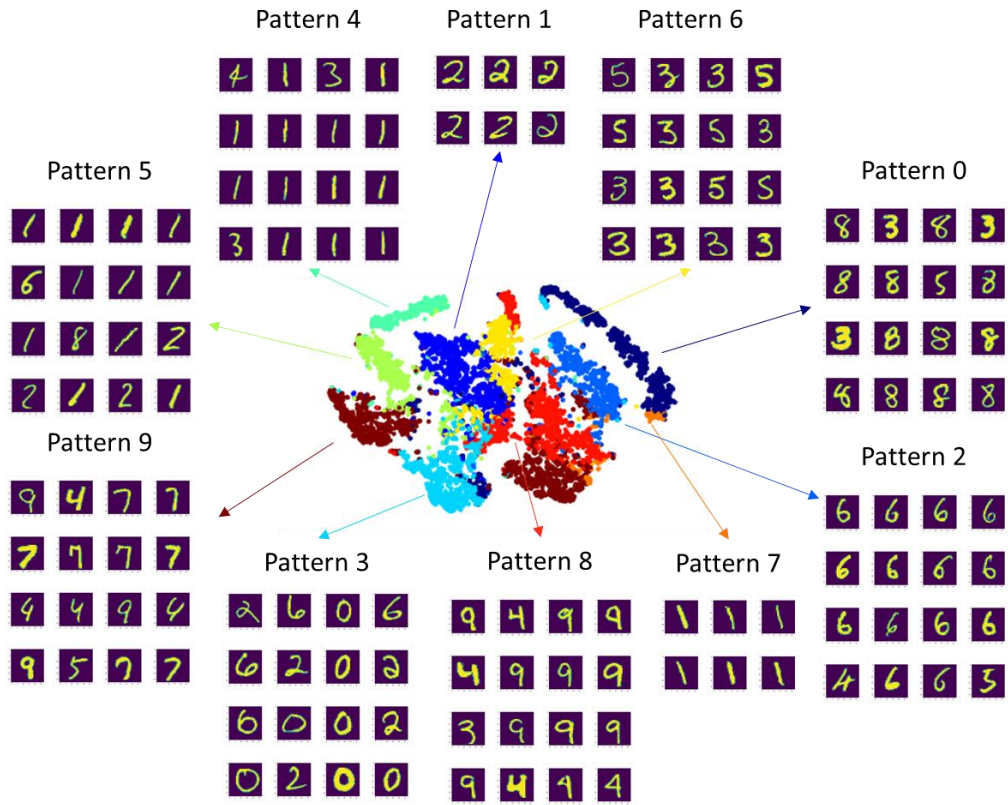

**Figure E 2.** Pattern-clusters identified by our CAE-FC using the MNIST dataset.

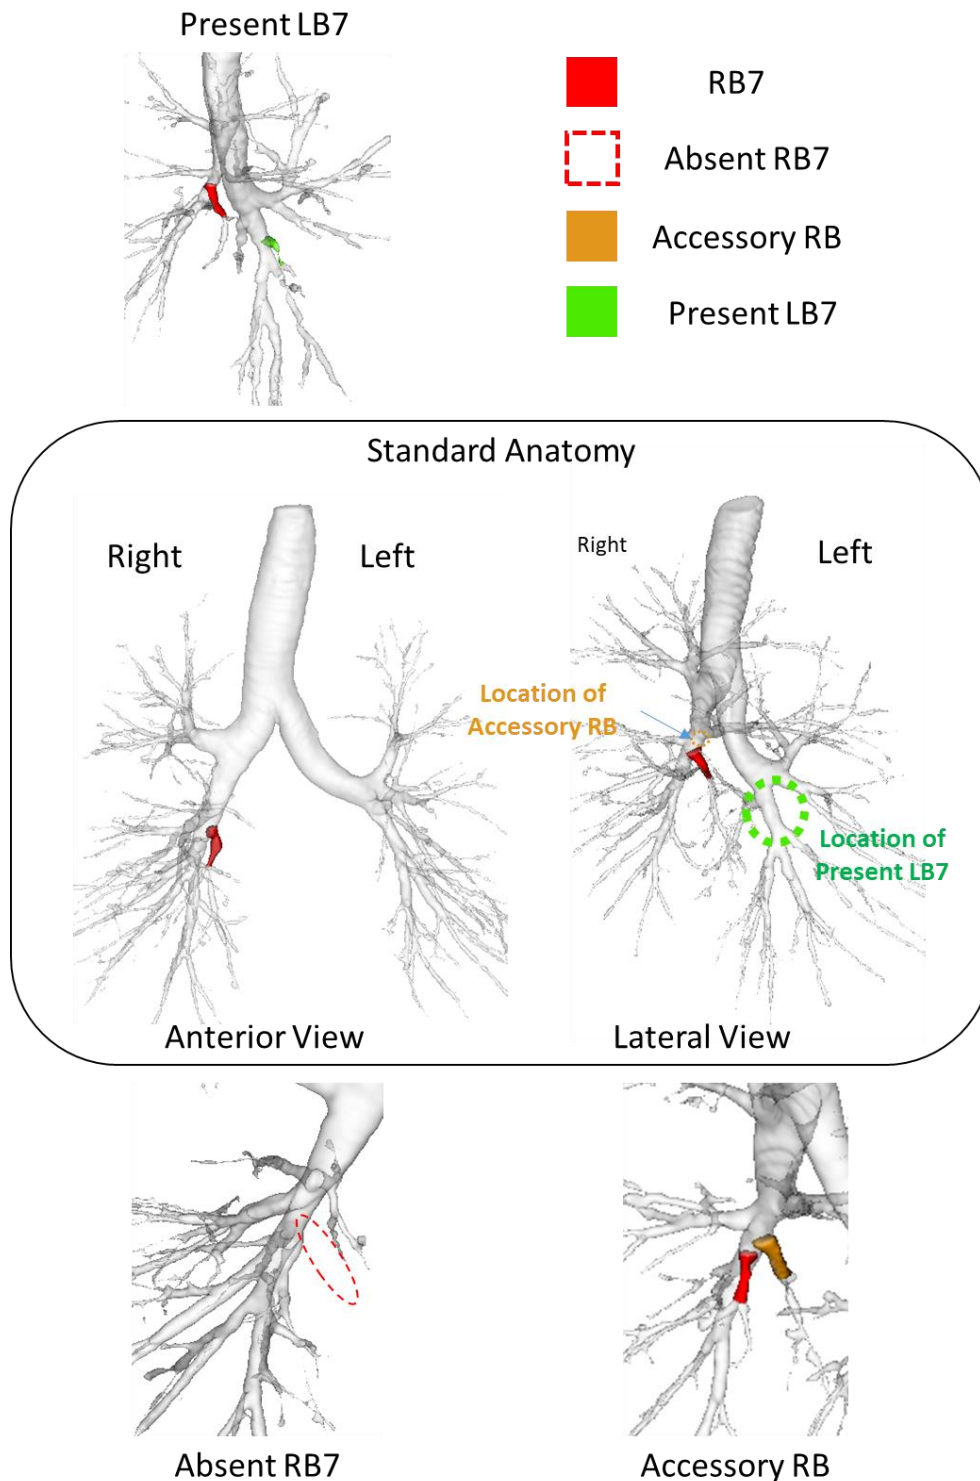

**Figure E 3.** Illustration of three airway variants with respect to standard airway anatomy: (1) absence of a right medial-basal RB7 branch in the right lower lobe (Absent RB7), (2) presence of an accessory sub-superior RB branch in the right lower lobe (Accessory RB), and (3) presence of an a left medial-basal LB7 in the left lower lobe (Present LB7).

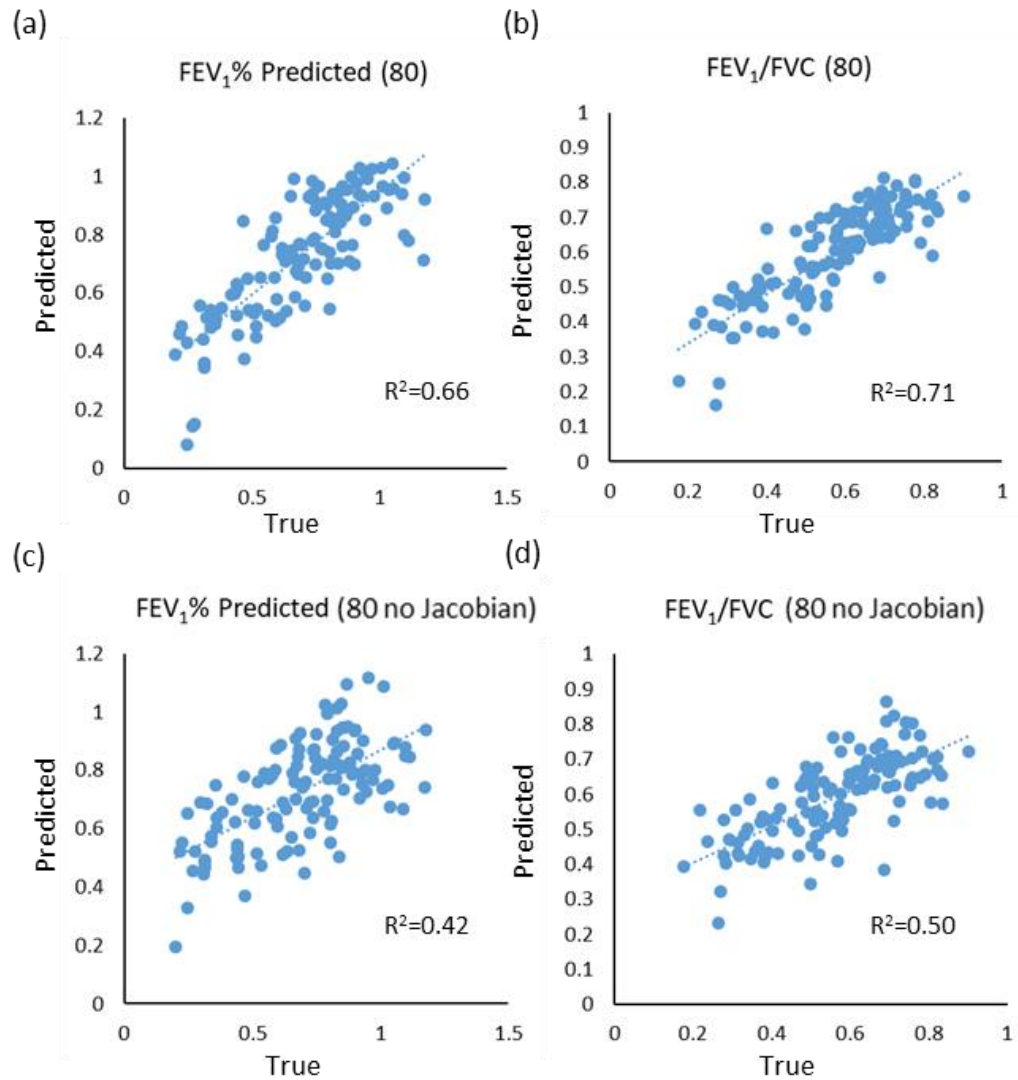

**Figure E 4.** The scatter plots of the true values versus the predicted values for (a) FEV<sub>1</sub>% predicted and (b) FEV<sub>1</sub>/FVC, using the model of seven factors extracted from 80 embeddings with Jacobian as a second channel. The scatter plots of the true values versus the predicted values for (c) FEV<sub>1</sub>% predicted and (d) FEV<sub>1</sub>/FVC, using the model of 80 embeddings without Jacobian as a second channel. The model with Jacobian as a second channel explained 23.9% and 20.7% more variation of FEV<sub>1</sub>% predicted and FEV<sub>1</sub>/FVC, respectively.

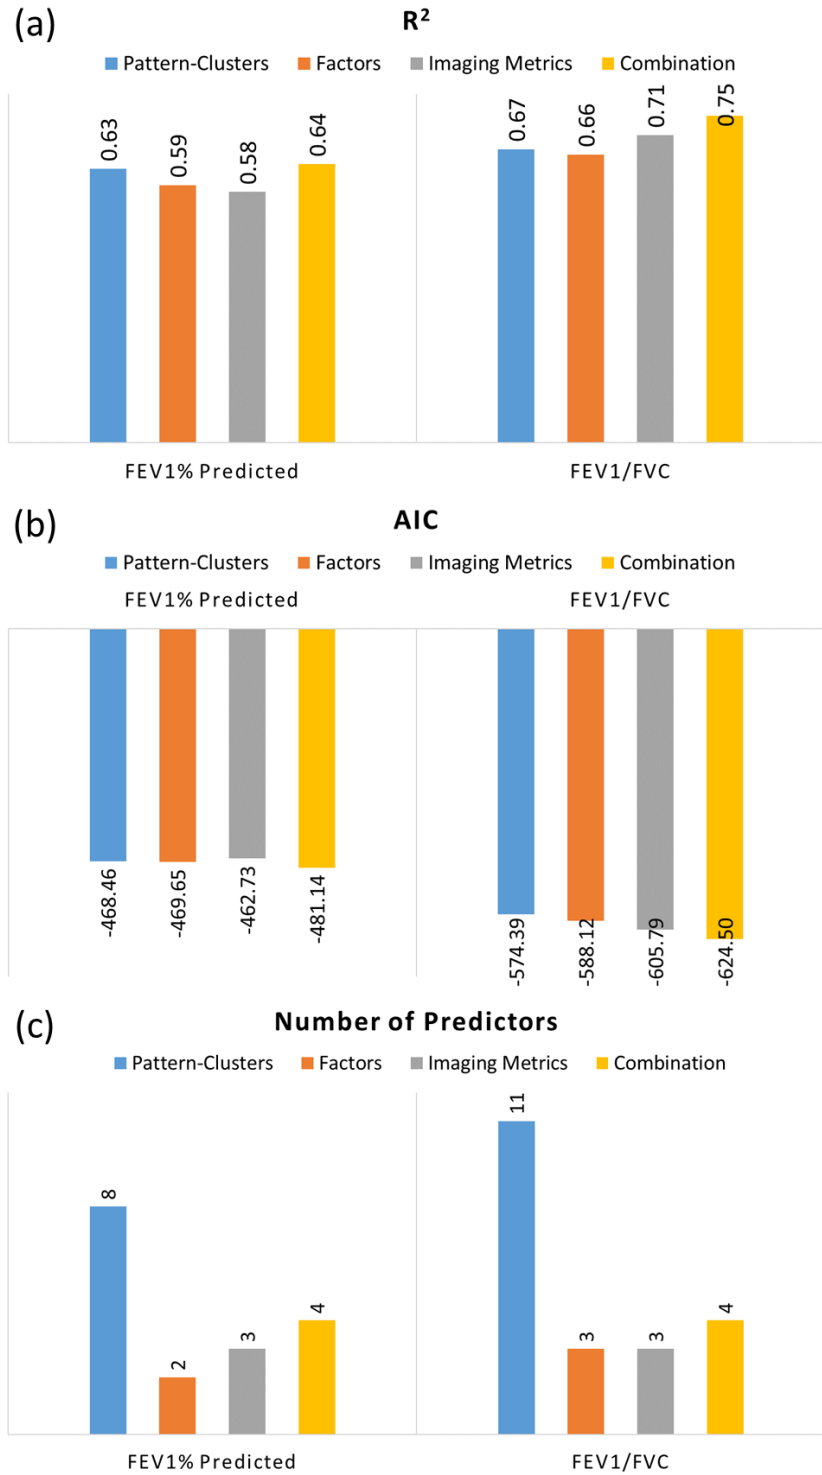

**Figure E 5.** Comparisons of (a)  $R^2$ , (b) AIC, and (c) number of predictors between factor-based models, pattern-cluster-based models, imaging-metric-based models, and combination models based on F0, F4, Emph% and fSAD% in regard to the ability to predict the pulmonary functions of FEV<sub>1</sub> and FEV<sub>1</sub>/FVC. The combination models outperformed the imaging-metric-based models.



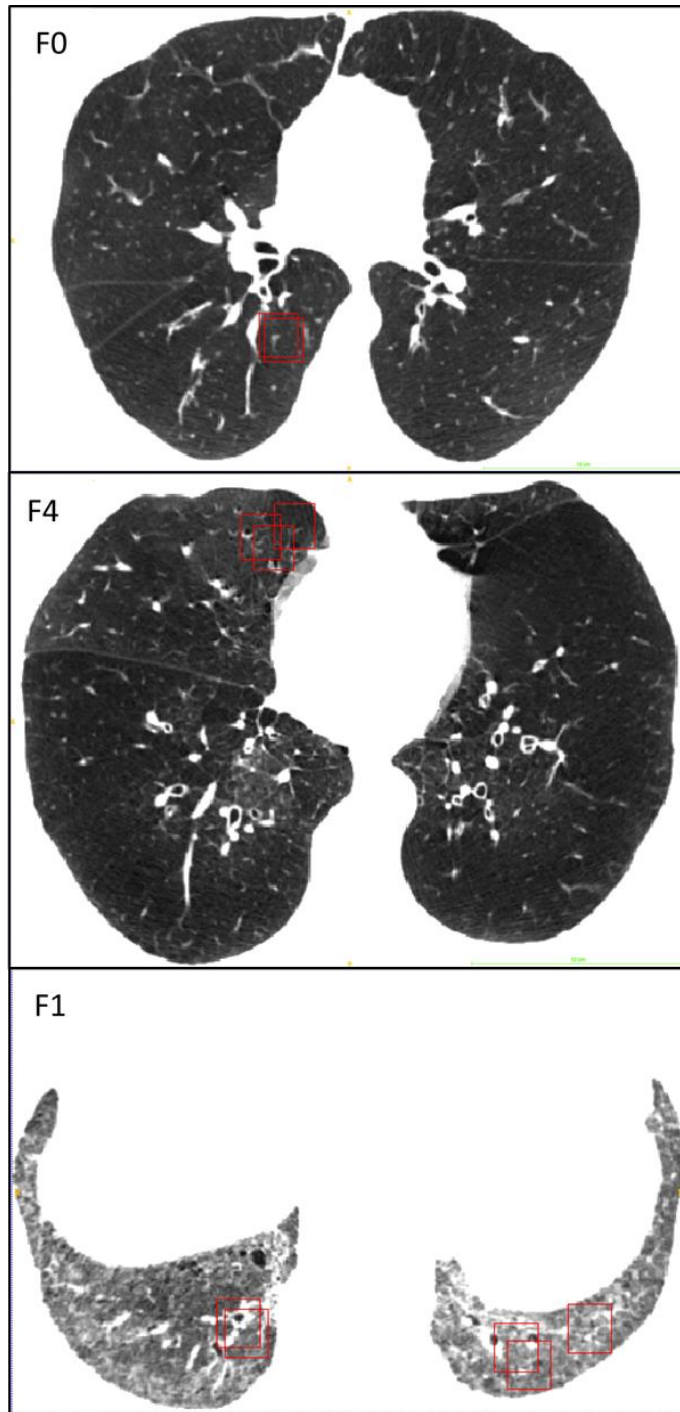

**Figure E 6.** Illustration of representative CT images for F0 and F4, marked with the ROIs in red bounding boxes belonging to associated pattern-clusters. A narrow window for emphysema with level of -700 HU and window of 750 HU (Lynch et al. 2015)<sup>8</sup> was used in these cases. A narrow window corresponds to the range of the minimum and maximum HUs to view the CT image. Using a narrow window helps radiologists identify CT features more sensitively. The ROIs for F1 appear to detect high attenuation areas in the basal lungs. These may include fibrotic features of lung with interstitial lung diseases (ILD), which is not supposedly related to smoking. CT patterns of F1 appear to be combined pulmonary fibrosis and emphysema (CPFE).

## Supplementary Tables

**Table E 1.** The percentages (%) of each digital number in each pattern classified by the CAE-FC. The order of the columns has been rearranged so that the digit with the highest proportion in each pattern would be on the diagonal of the table. The total accuracy was 0.4440 for the CAE-FC.

|                | <b>Pattern<br/>3</b> | <b>Pattern<br/>4</b> | <b>Pattern<br/>1</b> | <b>Pattern<br/>6</b> | <b>Pattern<br/>8</b> | <b>Pattern<br/>7</b> | <b>Pattern<br/>2</b> | <b>Pattern<br/>9</b> | <b>Pattern<br/>0</b> | <b>Pattern<br/>5</b> |              |
|----------------|----------------------|----------------------|----------------------|----------------------|----------------------|----------------------|----------------------|----------------------|----------------------|----------------------|--------------|
| <b>0</b>       | 36.46                | 0.00                 | 2.04                 | 1.08                 | 0.17                 | 0.73                 | 1.28                 | 0.31                 | 4.29                 | 3.38                 | <b>Total</b> |
| <b>1</b>       | 0.37                 | 84.68                | 0.00                 | 0.00                 | 0.00                 | 26.28                | 0.32                 | 0.03                 | 0.38                 | 56.93                |              |
| <b>2</b>       | 31.85                | 0.23                 | 90.48                | 0.54                 | 0.67                 | 1.46                 | 0.00                 | 1.49                 | 4.52                 | 3.04                 |              |
| <b>3</b>       | 1.45                 | 9.76                 | 4.08                 | 55.14                | 0.17                 | 0.73                 | 1.60                 | 3.08                 | 21.93                | 15.71                |              |
| <b>4</b>       | 1.08                 | 1.36                 | 0.68                 | 0.00                 | 49.41                | 0.00                 | 5.75                 | 21.66                | 0.23                 | 0.68                 |              |
| <b>5</b>       | 0.91                 | 0.57                 | 2.04                 | 34.46                | 0.84                 | 67.15                | 1.60                 | 8.77                 | 17.02                | 5.07                 |              |
| <b>6</b>       | 25.66                | 1.02                 | 0.68                 | 1.35                 | 0.51                 | 2.19                 | 88.50                | 0.14                 | 1.30                 | 2.70                 |              |
| <b>7</b>       | 0.83                 | 1.02                 | 0.00                 | 0.00                 | 3.71                 | 0.00                 | 0.00                 | 33.55                | 0.08                 | 1.35                 |              |
| <b>8</b>       | 1.00                 | 0.34                 | 0.00                 | 6.62                 | 0.17                 | 1.46                 | 0.64                 | 6.52                 | 49.23                | 10.64                |              |
| <b>9</b>       | 0.37                 | 1.02                 | 0.00                 | 0.81                 | 44.35                | 0.00                 | 0.32                 | 24.44                | 1.00                 | 0.51                 |              |
| <b>n</b>       | 2408                 | 881                  | 147                  | 740                  | 593                  | 137                  | 313                  | 2885                 | 1304                 | 592                  |              |
| <b>Correct</b> | 878                  | 746                  | 133                  | 408                  | 293                  | 92                   | 277                  | 968                  | 642                  | 3                    | 4440         |

**Table E 2.** The percentages (%) of each digital number in each pattern classified by the k-means. The order of the columns has been rearranged so that the digit with the highest proportion in each pattern would be on the diagonal of the table. The total accuracy was 0.3642 for k-means. This result suggested that the CAE-FC model (accuracy: 0.4440) can better cluster similar patterns together than the k-means approach.

|                | <b>Pattern 3</b> | <b>Pattern 8</b> | <b>Pattern 9</b> | <b>Pattern 1</b> | <b>Pattern 4</b> | <b>Pattern 6</b> | <b>Pattern 7</b> | <b>Pattern 5</b> | <b>Pattern 2</b> | <b>Pattern 0</b> |              |
|----------------|------------------|------------------|------------------|------------------|------------------|------------------|------------------|------------------|------------------|------------------|--------------|
| <b>0</b>       | 84.14            | 0.64             | 0.23             | 1.94             | 0.08             | 22.82            | 23.05            | 0.00             | 0.33             | 0.33             | <b>Total</b> |
| <b>1</b>       | 0.00             | 43.20            | 0.45             | 0.97             | 4.29             | 2.54             | 3.91             | 0.00             | 17.63            | 0.00             |              |
| <b>2</b>       | 3.11             | 0.69             | 92.05            | 45.84            | 3.83             | 0.30             | 23.70            | 3.24             | 0.86             | 0.20             |              |
| <b>3</b>       | 1.09             | 25.83            | 1.82             | 1.80             | 10.60            | 5.68             | 3.39             | 8.65             | 17.24            | 1.27             |              |
| <b>4</b>       | 0.31             | 2.08             | 0.00             | 2.91             | 11.88            | 2.84             | 2.21             | 3.78             | 14.21            | 32.80            |              |
| <b>5</b>       | 0.16             | 10.71            | 0.23             | 1.11             | 2.78             | 39.86            | 2.73             | 0.54             | 8.55             | 7.63             |              |
| <b>6</b>       | 9.80             | 2.61             | 0.68             | 36.98            | 0.98             | 21.10            | 38.41            | 0.00             | 3.75             | 0.47             |              |
| <b>7</b>       | 0.00             | 0.06             | 0.91             | 1.94             | 42.78            | 0.00             | 0.13             | 70.27            | 1.32             | 10.64            |              |
| <b>8</b>       | 0.93             | 11.81            | 3.64             | 5.12             | 12.93            | 3.85             | 2.21             | 9.73             | 19.14            | 10.51            |              |
| <b>9</b>       | 0.47             | 2.37             | 0.00             | 1.39             | 9.85             | 1.01             | 0.26             | 3.78             | 16.97            | 36.14            |              |
| <b>n</b>       | 643              | 1727             | 440              | 722              | 1330             | 986              | 768              | 370              | 1520             | 1494             | 10000        |
| <b>Correct</b> | 541              | 746              | 405              | 13               | 158              | 393              | 295              | 260              | 291              | 540              | 3642         |

**Table E 3.** AICs for models based on different numbers of embeddings and their corresponding numbers of factors to predict FEV<sub>1</sub> % predicted and FEV<sub>1</sub>/FVC.

| <b>N<sub>Embedding</sub></b> | <b>N<sub>Factor</sub></b> | <b>AIC<sub>FEV<sub>1</sub>%predicted</sub></b> | <b>AIC<sub>FEV<sub>1</sub>/FVC</sub></b> |
|------------------------------|---------------------------|------------------------------------------------|------------------------------------------|
| 16                           | 3                         | -447.34                                        | -561.75                                  |
| 32                           | 6                         | -425.61                                        | -545.88                                  |
| 48                           | 9                         | -439.89                                        | -542.34                                  |
| 64                           | 8                         | -456.42                                        | -561.98                                  |
| 80                           | 7                         | -476.02                                        | -590.98                                  |
| 96                           | 8                         | -426.68                                        | -531.38                                  |
| 112                          | 8                         | -451.41                                        | -557.53                                  |
| 80<br>(no Jacobian)          | 3                         | -417.69                                        | -531.25                                  |

**Table E 4.** Comparison of mean factor scores for F0 - F6 using Welch's ANOVA. There were significant differences between healthy non-smokers and GOLD 0-4 subjects for F0, F2, F4, F5, and F6. Cohen's d was derived from partial  $\eta^2$ .

|           | <b>Mean Factor Score</b> | <b>p value</b> | <b>Partial <math>\eta^2</math></b> | <b>Cohen's d</b> |
|-----------|--------------------------|----------------|------------------------------------|------------------|
| <b>F0</b> | 101.252                  | 6.619E-53      | 0.386                              | 0.837            |
| <b>F1</b> | 0.506                    | 7.719E-01      | 0.005                              | 0.009            |
| <b>F2</b> | 8.463                    | 2.903E-07      | 0.055                              | 0.110            |
| <b>F3</b> | 2.207                    | 5.500E-02      | 0.021                              | 0.043            |
| <b>F4</b> | 37.492                   | 5.283E-27      | 0.205                              | 0.419            |
| <b>F5</b> | 8.323                    | 3.363E-07      | 0.006                              | 0.012            |
| <b>F6</b> | 15.544                   | 6.127E-13      | 0.039                              | 0.078            |

**Table E 5.** Comparisons of mean factor scores of F0 between a pair of severity subgroups using the Games-Howell method for post-hoc pairwise tests. A and B represent the pair in the pair-wise comparisons. F0 is able to differentiate between GOLD 0 subjects and healthy non-smokers.

| <b>A</b> | <b>B</b> | <b>mean(A)</b> | <b>mean(B)</b> | <b>std.(A)</b> | <b>std.(B)</b> | <b>p value</b> | <b>Hedges' g</b> |
|----------|----------|----------------|----------------|----------------|----------------|----------------|------------------|
| G0       | G1       | -0.742         | -0.303         | 1.040          | 0.671          | 0.001          | -0.523           |
| G0       | G2       | -0.742         | 0.285          | 1.040          | 0.898          | 0.001          | -1.053           |
| G0       | G3       | -0.742         | 0.876          | 1.040          | 0.897          | 0.001          | -1.692           |
| G0       | G4       | -0.742         | 0.998          | 1.040          | 0.859          | 0.001          | -1.930           |
| G0       | healthy  | -0.742         | -1.066         | 1.040          | 0.436          | 0.020          | 0.486            |
| G1       | G2       | -0.303         | 0.285          | 0.671          | 0.898          | 0.001          | -0.764           |
| G1       | G3       | -0.303         | 0.876          | 0.671          | 0.897          | 0.001          | -1.476           |
| G1       | G4       | -0.303         | 0.998          | 0.671          | 0.859          | 0.001          | -1.595           |
| G1       | healthy  | -0.303         | -1.066         | 0.671          | 0.436          | 0.001          | 1.414            |
| G2       | G3       | 0.285          | 0.876          | 0.898          | 0.897          | 0.001          | -0.657           |
| G2       | G4       | 0.285          | 0.998          | 0.898          | 0.859          | 0.001          | -0.819           |
| G2       | healthy  | 0.285          | -1.066         | 0.898          | 0.436          | 0.001          | 2.237            |
| G3       | G4       | 0.876          | 0.998          | 0.897          | 0.859          | 0.900          | -0.139           |
| G3       | healthy  | 0.876          | -1.066         | 0.897          | 0.436          | 0.001          | 2.937            |
| G4       | healthy  | 0.998          | -1.066         | 0.859          | 0.436          | 0.001          | 2.822            |

**Table E 6.** Comparisons of mean factor scores of F4 between a pair of severity subgroups using the Games-Howell method for post-hoc pairwise tests. A and B represent the pair in the pair-wise comparisons. F4 is able to differentiate the difference between GOLD 3 subjects and GOLD 4 subjects.

| A  | B       | mean(A) | mean(B) | std.(A) | std.(B) | <i>p</i> value | Hedges' <i>g</i> |
|----|---------|---------|---------|---------|---------|----------------|------------------|
| G0 | G1      | -0.410  | -0.459  | 1.782   | 0.698   | 0.900          | 0.040            |
| G0 | G2      | -0.410  | -0.210  | 1.782   | 0.740   | 0.838          | -0.146           |
| G0 | G3      | -0.410  | 0.723   | 1.782   | 1.055   | 0.001          | -0.821           |
| G0 | G4      | -0.410  | 1.546   | 1.782   | 1.119   | 0.001          | -1.524           |
| G0 | healthy | -0.410  | -0.383  | 1.782   | 0.349   | 0.900          | -0.027           |
| G1 | G2      | -0.459  | -0.210  | 0.698   | 0.740   | 0.080          | -0.348           |
| G1 | G3      | -0.459  | 0.723   | 0.698   | 1.055   | 0.001          | -1.306           |
| G1 | G4      | -0.459  | 1.546   | 0.698   | 1.119   | 0.001          | -1.955           |
| G1 | healthy | -0.459  | -0.383  | 0.698   | 0.349   | 0.900          | -0.149           |
| G2 | G3      | -0.210  | 0.723   | 0.740   | 1.055   | 0.001          | -0.978           |
| G2 | G4      | -0.210  | 1.546   | 0.740   | 1.119   | 0.001          | -1.657           |
| G2 | healthy | -0.210  | -0.383  | 0.740   | 0.349   | 0.196          | 0.351            |
| G3 | G4      | 0.723   | 1.546   | 1.055   | 1.119   | 0.002          | -0.744           |
| G3 | healthy | 0.723   | -0.383  | 1.055   | 0.349   | 0.001          | 1.533            |
| G4 | healthy | 1.546   | -0.383  | 1.119   | 0.349   | 0.001          | 2.118            |

**Table E 7.** The predictors of PFTs chosen by the forward feature selection method for the factor-based model, the imaging-metric-based models, and the combination models.

|                                   | <b>Predictors</b>          |                                    |                           |
|-----------------------------------|----------------------------|------------------------------------|---------------------------|
|                                   | <b>Factor-based models</b> | <b>Imaging-metric-based models</b> | <b>Combination models</b> |
| <b>FEV<sub>1</sub>% predicted</b> | F0, F4                     | Emph%, ADI, fSAD%                  | Emph%, fSAD%, F0, F4      |
| <b>FEV<sub>1</sub>/FVC</b>        | F0, F4, F5                 | Emph%, fSAD%,<br>Jacobian          | Emph%, fSAD%, F0, F4      |



**Table E 8.** Comparisons of averaged CT intensity (i.e. first channel of ROIs) and averaged Jacobian (i.e. second channel of ROIs) between each factor using the Games-Howell method for post-hoc pairwise tests. A and B represent the pair in the pair-wise comparisons.

| A  | B  | CT Intensity |        |         |        |        | Jacobian |        |         |        |        |
|----|----|--------------|--------|---------|--------|--------|----------|--------|---------|--------|--------|
|    |    | mean(A)      | std(A) | mean(B) | std(B) | p      | mean(A)  | std(A) | mean(B) | std(B) | p      |
| F0 | F1 | 0.067        | 0.030  | 0.256   | 0.078  | <0.001 | 0.664    | 0.088  | 0.784   | 0.091  | <0.001 |
| F0 | F2 | 0.067        | 0.030  | 0.135   | 0.042  | <0.001 | 0.664    | 0.088  | 0.741   | 0.074  | <0.001 |
| F0 | F3 | 0.067        | 0.030  | 0.194   | 0.059  | <0.001 | 0.664    | 0.088  | 0.696   | 0.106  | 0.007  |
| F0 | F4 | 0.067        | 0.030  | 0.062   | 0.035  | <0.001 | 0.664    | 0.088  | 0.914   | 0.067  | <0.001 |
| F0 | F5 | 0.067        | 0.030  | 0.113   | 0.023  | <0.001 | 0.664    | 0.088  | 0.540   | 0.061  | <0.001 |
| F0 | F6 | 0.067        | 0.030  | 0.107   | 0.035  | <0.001 | 0.664    | 0.088  | 0.513   | 0.081  | <0.001 |
| F1 | F2 | 0.256        | 0.078  | 0.135   | 0.042  | <0.001 | 0.784    | 0.091  | 0.741   | 0.074  | <0.001 |
| F1 | F3 | 0.256        | 0.078  | 0.194   | 0.059  | <0.001 | 0.784    | 0.091  | 0.696   | 0.106  | <0.001 |
| F1 | F4 | 0.256        | 0.078  | 0.062   | 0.035  | <0.001 | 0.784    | 0.091  | 0.914   | 0.067  | <0.001 |
| F1 | F5 | 0.256        | 0.078  | 0.113   | 0.023  | <0.001 | 0.784    | 0.091  | 0.540   | 0.061  | <0.001 |
| F1 | F6 | 0.256        | 0.078  | 0.107   | 0.035  | <0.001 | 0.784    | 0.091  | 0.513   | 0.081  | <0.001 |
| F2 | F3 | 0.135        | 0.042  | 0.194   | 0.059  | <0.001 | 0.741    | 0.074  | 0.696   | 0.106  | <0.001 |
| F2 | F4 | 0.135        | 0.042  | 0.062   | 0.035  | <0.001 | 0.741    | 0.074  | 0.914   | 0.067  | <0.001 |
| F2 | F5 | 0.135        | 0.042  | 0.113   | 0.023  | <0.001 | 0.741    | 0.074  | 0.540   | 0.061  | <0.001 |
| F2 | F6 | 0.135        | 0.042  | 0.107   | 0.035  | <0.001 | 0.741    | 0.074  | 0.513   | 0.081  | <0.001 |
| F3 | F4 | 0.194        | 0.059  | 0.062   | 0.035  | <0.001 | 0.696    | 0.106  | 0.914   | 0.067  | <0.001 |
| F3 | F5 | 0.194        | 0.059  | 0.113   | 0.023  | <0.001 | 0.696    | 0.106  | 0.540   | 0.061  | <0.001 |
| F3 | F6 | 0.194        | 0.059  | 0.107   | 0.035  | <0.001 | 0.696    | 0.106  | 0.513   | 0.081  | <0.001 |
| F4 | F5 | 0.062        | 0.035  | 0.113   | 0.023  | <0.001 | 0.914    | 0.067  | 0.540   | 0.061  | <0.001 |
| F4 | F6 | 0.062        | 0.035  | 0.107   | 0.035  | <0.001 | 0.914    | 0.067  | 0.513   | 0.081  | <0.001 |
| F5 | F6 | 0.113        | 0.023  | 0.107   | 0.035  | 0.718  | 0.540    | 0.061  | 0.513   | 0.081  | 0.118  |

**Table E 9.** The percentages of standard airway anatomy and variants among the former smokers in this study, compared with those reported by Smith et al. <sup>9</sup>. Since airway variants are not mutually exclusive, the sum of the percentages may exceed unity.

|                               | <b>Smith et al., 2018</b> | <b>Current Study</b> |
|-------------------------------|---------------------------|----------------------|
| <b>Standard anatomy</b>       | 73.50%                    | 61.52%               |
| <b>Accessory sub-superior</b> |                           |                      |
| <b>Accessory RB</b>           | 16.00%                    | 14.63%               |
| <b>Accessory LB</b>           |                           | 6.41%                |
| <b>Medial-basal</b>           |                           |                      |
| <b>Absent RB7</b>             | 6.10%                     | 11.22%               |
| <b>Present LB7</b>            | < 4.00%                   | 11.62%               |

**Table E 10.** The correlations between each of the seven factors and related clinical variables, imaging-based variables, and use of drugs. See **Table E 11** for the descriptions of the variables.

|                                    | F0     |          | F1     |          | F2     |          | F3     |          | F4     |          | F5     |          | F6     |          |
|------------------------------------|--------|----------|--------|----------|--------|----------|--------|----------|--------|----------|--------|----------|--------|----------|
|                                    | r      | p        | r      | p        | r      | p        | r      | p        | r      | p        | r      | p        | r      | p        |
| <b>ADVAIR</b>                      | 0.052  | 4.90E-01 | 0.031  | 6.77E-01 | -0.071 | 3.45E-01 | -0.009 | 9.02E-01 | 0.008  | 9.12E-01 | -0.003 | 9.63E-01 | 0.106  | 1.57E-01 |
| <b>AEROBID</b>                     | 0.019  | 8.00E-01 | -0.041 | 5.88E-01 | 0.189  | 1.29E-02 | 0.072  | 3.47E-01 | -0.028 | 7.14E-01 | -0.027 | 7.24E-01 | -0.075 | 3.29E-01 |
| <b>AGE_DERV_01</b>                 | 0.070  | 1.13E-01 | -0.007 | 8.82E-01 | 0.071  | 1.07E-01 | 0.002  | 9.61E-01 | -0.005 | 9.16E-01 | 0.125  | 4.31E-03 | 0.051  | 2.44E-01 |
| <b>ALBUTEROL</b>                   | -0.006 | 9.26E-01 | -0.035 | 5.92E-01 | 0.102  | 1.12E-01 | 0.045  | 4.86E-01 | -0.020 | 7.57E-01 | 0.023  | 7.25E-01 | -0.127 | 4.88E-02 |
| <b>ALBUTEROL_NEB</b>               | -0.316 | 2.89E-02 | -0.061 | 6.80E-01 | -0.020 | 8.92E-01 | -0.178 | 2.26E-01 | -0.132 | 3.71E-01 | 0.284  | 5.05E-02 | 0.226  | 1.23E-01 |
| <b>ALBUTEROLIPRATROPIUMBROMIDE</b> | 0.223  | 1.24E-01 | 0.193  | 1.84E-01 | 0.162  | 2.66E-01 | 0.266  | 6.50E-02 | 0.356  | 1.21E-02 | -0.326 | 2.24E-02 | 0.028  | 8.48E-01 |
| <b>APNEA_DIAGNOSED01</b>           | -0.086 | 5.53E-02 | 0.062  | 1.69E-01 | -0.086 | 5.37E-02 | 0.076  | 8.83E-02 | -0.030 | 5.08E-01 | 0.058  | 1.99E-01 | 0.111  | 1.33E-02 |
| <b>ARFORMOTEROL</b>                | 0.293  | 4.32E-02 | 0.062  | 6.73E-01 | 0.053  | 7.21E-01 | 0.264  | 6.98E-02 | 0.039  | 7.92E-01 | -0.160 | 2.79E-01 | -0.107 | 4.68E-01 |
| <b>AZMACORT</b>                    | -0.161 | 3.54E-02 | 0.358  | 1.39E-06 | 0.107  | 1.61E-01 | -0.011 | 8.90E-01 | -0.018 | 8.17E-01 | 0.165  | 3.01E-02 | 0.060  | 4.34E-01 |
| <b>BMH08B</b>                      | 0.059  | 1.84E-01 | -0.014 | 7.56E-01 | 0.058  | 1.92E-01 | 0.009  | 8.47E-01 | -0.031 | 4.88E-01 | 0.053  | 2.33E-01 | -0.021 | 6.42E-01 |
| <b>BMH08D</b>                      | -0.002 | 9.72E-01 | -0.004 | 9.32E-01 | -0.004 | 9.37E-01 | -0.006 | 8.98E-01 | 0.002  | 9.65E-01 | -0.020 | 6.56E-01 | 0.021  | 6.34E-01 |
| <b>BMH08H</b>                      | -0.036 | 4.09E-01 | 0.103  | 1.91E-02 | 0.029  | 5.08E-01 | 0.021  | 6.37E-01 | 0.027  | 5.42E-01 | 0.091  | 3.85E-02 | -0.030 | 5.01E-01 |
| <b>BMH13A</b>                      | -0.086 | 5.06E-02 | 0.135  | 2.19E-03 | 0.038  | 3.93E-01 | 0.074  | 9.37E-02 | -0.033 | 4.62E-01 | 0.110  | 1.29E-02 | 0.031  | 4.78E-01 |
| <b>BMI_CM01</b>                    | -0.161 | 2.38E-04 | 0.211  | 1.21E-06 | -0.109 | 1.31E-02 | 0.057  | 1.97E-01 | -0.078 | 7.65E-02 | 0.275  | 1.97E-10 | 0.055  | 2.15E-01 |
| <b>BUDESONIDEFORMOTEROL</b>        | 0.123  | 6.18E-02 | -0.105 | 1.12E-01 | 0.032  | 6.32E-01 | 0.078  | 2.39E-01 | 0.090  | 1.72E-01 | -0.120 | 6.90E-02 | -0.150 | 2.21E-02 |
| <b>CB_DIAGNOSED01</b>              | 0.138  | 2.03E-03 | 0.116  | 9.52E-03 | -0.001 | 9.89E-01 | 0.117  | 9.25E-03 | 0.139  | 1.86E-03 | -0.020 | 6.50E-01 | -0.034 | 4.52E-01 |
| <b>CB_VISIT1</b>                   | 0.029  | 5.19E-01 | 0.063  | 1.55E-01 | 0.005  | 9.10E-01 | 0.031  | 4.84E-01 | 0.086  | 5.46E-02 | 0.009  | 8.41E-01 | -0.031 | 4.93E-01 |
| <b>CBC_BASOPHIL_PCT01</b>          | 0.007  | 8.72E-01 | -0.054 | 2.26E-01 | -0.097 | 2.89E-02 | -0.022 | 6.17E-01 | -0.039 | 3.77E-01 | 0.011  | 7.99E-01 | 0.045  | 3.12E-01 |
| <b>CBC_EOSINOPHIL_PCT01</b>        | 0.017  | 7.00E-01 | 0.004  | 9.30E-01 | -0.066 | 1.34E-01 | 0.050  | 2.55E-01 | -0.018 | 6.91E-01 | 0.003  | 9.37E-01 | -0.030 | 5.00E-01 |
| <b>CBC_LYMPHOCYTE_PCT01</b>        | -0.162 | 2.27E-04 | 0.010  | 8.18E-01 | -0.011 | 8.06E-01 | -0.061 | 1.66E-01 | -0.123 | 5.23E-03 | 0.052  | 2.38E-01 | -0.044 | 3.24E-01 |
| <b>CBC_MONOCYTE_PCT01</b>          | 0.001  | 9.83E-01 | -0.002 | 9.59E-01 | 0.027  | 5.36E-01 | 0.061  | 1.71E-01 | -0.018 | 6.92E-01 | -0.013 | 7.62E-01 | 0.057  | 1.96E-01 |
| <b>CBC_NEUTROPHIL_PCT01</b>        | 0.126  | 4.38E-03 | 0.001  | 9.83E-01 | 0.021  | 6.36E-01 | 0.015  | 7.30E-01 | 0.112  | 1.12E-02 | -0.031 | 4.80E-01 | 0.031  | 4.78E-01 |
| <b>CBC07_DERV</b>                  | -0.011 | 8.13E-01 | 0.048  | 3.21E-01 | 0.096  | 4.58E-02 | 0.042  | 3.80E-01 | 0.019  | 6.92E-01 | 0.113  | 1.88E-02 | 0.010  | 8.35E-01 |
| <b>CBC08_DERV</b>                  | 0.164  | 1.97E-04 | 0.055  | 2.10E-01 | 0.010  | 8.14E-01 | 0.073  | 9.95E-02 | 0.135  | 2.24E-03 | 0.064  | 1.50E-01 | -0.030 | 4.98E-01 |
| <b>COPD_DIAGNOSED01</b>            | 0.362  | 4.87E-17 | 0.016  | 7.24E-01 | 0.085  | 5.57E-02 | 0.114  | 1.06E-02 | 0.262  | 2.42E-09 | -0.151 | 6.87E-04 | 0.022  | 6.28E-01 |
| <b>COPDSCORE0101</b>               | 0.212  | 2.45E-06 | 0.106  | 1.95E-02 | 0.120  | 7.93E-03 | 0.099  | 2.88E-02 | 0.315  | 1.18E-12 | -0.009 | 8.45E-01 | -0.029 | 5.17E-01 |
| <b>EMPHYSEMA_DIAGNOSED01</b>       | 0.277  | 3.28E-10 | 0.057  | 2.04E-01 | 0.086  | 5.52E-02 | 0.129  | 3.94E-03 | 0.276  | 3.96E-10 | -0.086 | 5.64E-02 | -0.028 | 5.40E-01 |
| <b>ETHNICITY</b>                   | -0.132 | 2.66E-03 | 0.138  | 1.65E-03 | -0.002 | 9.70E-01 | 0.036  | 4.10E-01 | 0.073  | 9.78E-02 | 0.053  | 2.25E-01 | -0.053 | 2.24E-01 |
| <b>FEV1/FVC_norm</b>               | -0.698 | 5.74E-77 | 0.039  | 3.76E-01 | -0.168 | 1.25E-04 | -0.101 | 2.08E-02 | -0.475 | 1.31E-30 | 0.318  | 1.12E-13 | 0.046  | 2.92E-01 |
| <b>FLOVENT</b>                     | 0.070  | 3.54E-01 | -0.024 | 7.57E-01 | -0.043 | 5.72E-01 | -0.014 | 8.56E-01 | -0.002 | 9.78E-01 | -0.036 | 6.31E-01 | 0.082  | 2.81E-01 |

|                                       |        |          |        |          |        |          |        |          |        |          |        |          |        |          |
|---------------------------------------|--------|----------|--------|----------|--------|----------|--------|----------|--------|----------|--------|----------|--------|----------|
| <b>FLUTICASONESALMETEROL</b>          | -0.054 | 4.08E-01 | -0.038 | 5.62E-01 | -0.027 | 6.75E-01 | 0.065  | 3.23E-01 | -0.023 | 7.22E-01 | -0.036 | 5.86E-01 | 0.031  | 6.31E-01 |
| <b>FORMOTEROL</b>                     | 0.134  | 4.20E-02 | 0.018  | 7.80E-01 | 0.010  | 8.80E-01 | 0.006  | 9.31E-01 | -0.013 | 8.41E-01 | -0.055 | 4.05E-01 | 0.011  | 8.72E-01 |
| <b>FORMOTEROL_NEB</b>                 | -0.124 | 3.97E-01 | -0.183 | 2.07E-01 | 0.111  | 4.50E-01 | -0.094 | 5.22E-01 | 0.169  | 2.47E-01 | -0.099 | 5.00E-01 | -0.035 | 8.13E-01 |
| <b>GENDER</b>                         | -0.223 | 3.00E-07 | -0.138 | 1.58E-03 | 0.058  | 1.84E-01 | -0.242 | 2.22E-08 | 0.119  | 6.59E-03 | 0.005  | 9.18E-01 | -0.354 | 8.66E-17 |
| <b>IPRATBROMIALBUTSULFA</b>           | -0.025 | 7.04E-01 | -0.053 | 4.26E-01 | -0.036 | 5.87E-01 | -0.107 | 1.05E-01 | 0.020  | 7.57E-01 | -0.040 | 5.48E-01 | 0.089  | 1.78E-01 |
| <b>IPRATROPIUMBROMIDE</b>             | 0.058  | 3.81E-01 | -0.020 | 7.66E-01 | -0.025 | 7.06E-01 | 0.041  | 5.33E-01 | -0.019 | 7.68E-01 | -0.064 | 3.29E-01 | -0.059 | 3.69E-01 |
| <b>IPRATROPIUMBROMIDE_NEB</b>         | -0.018 | 9.05E-01 | -0.072 | 6.26E-01 | -0.183 | 2.13E-01 | -0.169 | 2.50E-01 | -0.162 | 2.71E-01 | 0.104  | 4.82E-01 | -0.255 | 7.97E-02 |
| <b>LEVALBUTEROL</b>                   | 0.030  | 6.48E-01 | -0.007 | 9.11E-01 | -0.028 | 6.68E-01 | 0.043  | 5.13E-01 | -0.068 | 3.01E-01 | -0.023 | 7.32E-01 | -0.007 | 9.12E-01 |
| <b>METAPROTERENOL</b>                 | 0.079  | 2.33E-01 | 0.059  | 3.73E-01 | 0.206  | 1.59E-03 | 0.140  | 3.26E-02 | 0.116  | 7.80E-02 | -0.042 | 5.23E-01 | 0.017  | 7.94E-01 |
| <b>OTHERSTEROIDS</b>                  | 0.037  | 6.35E-01 | -0.068 | 3.84E-01 | 0.079  | 3.10E-01 | -0.032 | 6.76E-01 | 0.016  | 8.37E-01 | -0.003 | 9.67E-01 | -0.140 | 6.99E-02 |
| <b>PCT_POST_FEV1_V1_norm</b>          | -0.647 | 8.13E-63 | -0.037 | 4.06E-01 | -0.249 | 9.22E-09 | -0.134 | 2.24E-03 | -0.510 | 1.22E-35 | 0.169  | 1.05E-04 | 0.128  | 3.42E-03 |
| <b>PEX_SEVERE</b>                     | 0.196  | 6.97E-06 | 0.064  | 1.46E-01 | 0.125  | 4.42E-03 | 0.159  | 2.67E-04 | 0.200  | 4.61E-06 | -0.057 | 1.95E-01 | -0.060 | 1.70E-01 |
| <b>PEX_TOT</b>                        | 0.262  | 1.32E-09 | 0.034  | 4.42E-01 | 0.105  | 1.67E-02 | 0.170  | 9.63E-05 | 0.251  | 6.96E-09 | -0.093 | 3.49E-02 | -0.080 | 6.84E-02 |
| <b>PEX_TOT0101</b>                    | 0.158  | 3.14E-04 | -0.038 | 3.89E-01 | 0.106  | 1.55E-02 | 0.038  | 3.89E-01 | 0.253  | 5.15E-09 | -0.105 | 1.69E-02 | -0.133 | 2.33E-03 |
| <b>PIRBUTEROL</b>                     | 0.111  | 9.14E-02 | -0.012 | 8.54E-01 | -0.051 | 4.37E-01 | -0.036 | 5.81E-01 | 0.017  | 7.98E-01 | -0.040 | 5.46E-01 | 0.026  | 6.96E-01 |
| <b>POSBD_FEV1</b>                     | -0.477 | 8.93E-31 | 0.030  | 4.90E-01 | -0.287 | 2.49E-11 | -0.020 | 6.41E-01 | -0.539 | 2.26E-40 | 0.126  | 4.17E-03 | 0.336  | 3.84E-15 |
| <b>POSBD_FVC</b>                      | -0.049 | 2.69E-01 | 0.019  | 6.71E-01 | -0.288 | 2.38E-11 | 0.058  | 1.88E-01 | -0.392 | 1.58E-20 | -0.085 | 5.29E-02 | 0.465  | 3.32E-29 |
| <b>PULMICORT</b>                      | -0.022 | 7.73E-01 | -0.063 | 4.12E-01 | 0.052  | 4.95E-01 | -0.127 | 9.69E-02 | -0.042 | 5.80E-01 | -0.003 | 9.70E-01 | -0.041 | 5.96E-01 |
| <b>PULMONARY_VASCULAR_CONDITION01</b> | 0.055  | 2.17E-01 | 0.048  | 2.80E-01 | 0.078  | 8.04E-02 | 0.075  | 8.89E-02 | 0.085  | 5.52E-02 | 0.004  | 9.30E-01 | 0.001  | 9.82E-01 |
| <b>QVAR</b>                           | -0.163 | 3.28E-02 | -0.037 | 6.26E-01 | -0.060 | 4.36E-01 | -0.027 | 7.22E-01 | -0.147 | 5.51E-02 | 0.061  | 4.25E-01 | 0.033  | 6.63E-01 |
| <b>RDS08</b>                          | 0.189  | 1.54E-05 | 0.067  | 1.30E-01 | 0.085  | 5.27E-02 | 0.075  | 9.01E-02 | 0.102  | 2.05E-02 | -0.001 | 9.78E-01 | -0.001 | 9.91E-01 |
| <b>RDS12</b>                          | 0.034  | 4.45E-01 | 0.042  | 3.42E-01 | 0.106  | 1.62E-02 | -0.004 | 9.37E-01 | 0.027  | 5.36E-01 | -0.018 | 6.85E-01 | -0.033 | 4.52E-01 |
| <b>RDS16</b>                          | 0.031  | 4.84E-01 | -0.028 | 5.32E-01 | 0.032  | 4.63E-01 | -0.003 | 9.50E-01 | -0.020 | 6.56E-01 | -0.009 | 8.44E-01 | -0.071 | 1.08E-01 |
| <b>RDS25A3</b>                        | 0.097  | 2.76E-02 | 0.004  | 9.19E-01 | -0.043 | 3.34E-01 | -0.031 | 4.86E-01 | 0.012  | 7.78E-01 | -0.018 | 6.86E-01 | -0.036 | 4.14E-01 |
| <b>RDS25B3</b>                        | 0.109  | 1.33E-02 | -0.010 | 8.25E-01 | 0.022  | 6.23E-01 | 0.048  | 2.74E-01 | -0.008 | 8.49E-01 | -0.028 | 5.32E-01 | -0.039 | 3.73E-01 |
| <b>RMU09A1</b>                        | -0.197 | 5.14E-02 | 0.009  | 9.30E-01 | -0.116 | 2.55E-01 | -0.041 | 6.89E-01 | -0.015 | 8.84E-01 | -0.153 | 1.34E-01 | 0.047  | 6.46E-01 |
| <b>RMU09A10</b>                       | 0.166  | 1.09E-01 | -0.017 | 8.73E-01 | -0.041 | 6.93E-01 | 0.059  | 5.74E-01 | -0.198 | 5.59E-02 | 0.019  | 8.56E-01 | -0.017 | 8.74E-01 |
| <b>RMU09A2</b>                        | 0.028  | 7.85E-01 | -0.047 | 6.47E-01 | 0.136  | 1.87E-01 | -0.036 | 7.24E-01 | 0.025  | 8.06E-01 | -0.029 | 7.80E-01 | -0.065 | 5.29E-01 |
| <b>RMU09A3</b>                        | -0.112 | 2.79E-01 | 0.201  | 4.95E-02 | 0.015  | 8.86E-01 | -0.010 | 9.24E-01 | 0.021  | 8.39E-01 | 0.137  | 1.85E-01 | 0.007  | 9.42E-01 |
| <b>RMU09A5</b>                        | 0.222  | 2.98E-02 | -0.073 | 4.79E-01 | 0.000  | 9.98E-01 | -0.004 | 9.70E-01 | -0.045 | 6.66E-01 | -0.086 | 4.07E-01 | -0.118 | 2.53E-01 |
| <b>RMU09A6</b>                        | -0.047 | 6.47E-01 | -0.012 | 9.10E-01 | 0.026  | 8.01E-01 | -0.007 | 9.43E-01 | -0.009 | 9.29E-01 | 0.173  | 9.14E-02 | 0.080  | 4.40E-01 |
| <b>RMU09A7</b>                        | 0.050  | 6.27E-01 | -0.046 | 6.58E-01 | -0.012 | 9.08E-01 | 0.009  | 9.33E-01 | -0.144 | 1.61E-01 | -0.049 | 6.34E-01 | -0.042 | 6.82E-01 |
| <b>RMU09A8</b>                        | 0.191  | 6.44E-02 | 0.025  | 8.10E-01 | 0.143  | 1.68E-01 | -0.120 | 2.45E-01 | 0.164  | 1.11E-01 | 0.099  | 3.42E-01 | -0.056 | 5.87E-01 |
| <b>RMU09A9</b>                        | 0.092  | 3.72E-01 | 0.007  | 9.44E-01 | -0.033 | 7.51E-01 | 0.085  | 4.11E-01 | -0.187 | 6.84E-02 | -0.015 | 8.82E-01 | 0.059  | 5.66E-01 |

|                                   |        |          |        |          |        |          |        |          |        |          |        |          |        |          |
|-----------------------------------|--------|----------|--------|----------|--------|----------|--------|----------|--------|----------|--------|----------|--------|----------|
| <b>RMU11</b>                      | 0.023  | 6.11E-01 | 0.034  | 4.46E-01 | 0.043  | 3.38E-01 | -0.004 | 9.31E-01 | -0.083 | 6.17E-02 | 0.028  | 5.36E-01 | 0.124  | 5.48E-03 |
| <b>SALMETEROL</b>                 | 0.040  | 5.44E-01 | 0.004  | 9.56E-01 | 0.137  | 3.68E-02 | 0.066  | 3.12E-01 | 0.135  | 3.94E-02 | -0.006 | 9.28E-01 | 0.048  | 4.61E-01 |
| <b>SIX_MINUTE_WALK_DISTANCE01</b> | -0.214 | 1.32E-06 | -0.047 | 2.90E-01 | -0.140 | 1.62E-03 | -0.038 | 3.91E-01 | -0.406 | 2.81E-21 | 0.055  | 2.19E-01 | 0.134  | 2.66E-03 |
| <b>SMOKING_PACK_YEARS01</b>       | 0.147  | 7.92E-04 | 0.074  | 9.15E-02 | -0.036 | 4.15E-01 | 0.067  | 1.25E-01 | -0.019 | 6.66E-01 | 0.036  | 4.18E-01 | 0.121  | 5.70E-03 |
| <b>SMW_DSAT01</b>                 | 0.285  | 9.00E-11 | 0.060  | 1.78E-01 | 0.092  | 3.94E-02 | 0.110  | 1.39E-02 | 0.377  | 2.47E-18 | -0.119 | 7.96E-03 | -0.104 | 1.98E-02 |
| <b>SYMBICORT</b>                  | 0.043  | 5.78E-01 | -0.045 | 5.56E-01 | 0.036  | 6.39E-01 | 0.040  | 6.02E-01 | 0.056  | 4.67E-01 | -0.050 | 5.19E-01 | -0.063 | 4.12E-01 |
| <b>TIOTROPIUM</b>                 | 0.104  | 1.06E-01 | -0.007 | 9.18E-01 | 0.086  | 1.80E-01 | 0.001  | 9.93E-01 | 0.156  | 1.48E-02 | -0.064 | 3.24E-01 | -0.027 | 6.72E-01 |
| <b>V1_MMP3</b>                    | 0.185  | 7.60E-05 | 0.029  | 5.42E-01 | 0.042  | 3.72E-01 | 0.110  | 1.95E-02 | 0.109  | 1.99E-02 | -0.071 | 1.30E-01 | 0.084  | 7.48E-02 |
| <b>WHEEZINGAGE</b>                | 0.034  | 5.99E-01 | 0.062  | 3.33E-01 | 0.033  | 6.02E-01 | 0.082  | 2.01E-01 | -0.040 | 5.30E-01 | 0.068  | 2.90E-01 | -0.044 | 4.87E-01 |
| <b>Emphysratio_Emphys_Total</b>   | 0.544  | 1.44E-40 | -0.061 | 1.70E-01 | -0.052 | 2.37E-01 | 0.114  | 1.02E-02 | 0.505  | 2.50E-34 | -0.477 | 2.93E-30 | 0.036  | 4.22E-01 |
| <b>Emphysratio_Emphys_RUL</b>     | 0.441  | 1.29E-25 | 0.005  | 9.04E-01 | -0.041 | 3.55E-01 | 0.156  | 4.21E-04 | 0.479  | 1.41E-30 | -0.379 | 7.09E-19 | 0.019  | 6.67E-01 |
| <b>Emphysratio_Emphys_RML</b>     | 0.479  | 1.52E-30 | -0.107 | 1.56E-02 | -0.095 | 3.23E-02 | 0.026  | 5.55E-01 | 0.355  | 1.45E-16 | -0.429 | 3.12E-24 | 0.032  | 4.76E-01 |
| <b>Emphysratio_Emphys_RLL</b>     | 0.520  | 1.19E-36 | -0.133 | 2.68E-03 | -0.025 | 5.73E-01 | 0.041  | 3.61E-01 | 0.444  | 5.11E-26 | -0.466 | 7.48E-29 | -0.009 | 8.43E-01 |
| <b>Emphysratio_Emphys_LUL</b>     | 0.483  | 4.37E-31 | -0.040 | 3.67E-01 | -0.079 | 7.63E-02 | 0.116  | 8.56E-03 | 0.435  | 6.51E-25 | -0.435 | 6.93E-25 | 0.041  | 3.54E-01 |
| <b>Emphysratio_Emphys_LLL</b>     | 0.528  | 7.25E-38 | -0.126 | 4.40E-03 | -0.014 | 7.46E-01 | 0.037  | 4.03E-01 | 0.440  | 1.74E-25 | -0.457 | 1.15E-27 | 0.016  | 7.20E-01 |
| <b>fSADratio_Emphys_Total</b>     | 0.686  | 5.14E-72 | -0.040 | 3.70E-01 | 0.203  | 3.87E-06 | 0.041  | 3.58E-01 | 0.491  | 3.30E-32 | -0.355 | 1.59E-16 | -0.132 | 2.90E-03 |
| <b>fSADratio_Emphys_RUL</b>       | 0.668  | 3.74E-67 | -0.022 | 6.25E-01 | 0.179  | 4.92E-05 | 0.062  | 1.63E-01 | 0.461  | 3.43E-28 | -0.347 | 6.83E-16 | -0.137 | 2.00E-03 |
| <b>fSADratio_Emphys_RML</b>       | 0.627  | 5.77E-57 | -0.054 | 2.24E-01 | 0.182  | 3.69E-05 | 0.007  | 8.77E-01 | 0.269  | 6.95E-10 | -0.308 | 1.14E-12 | -0.081 | 6.87E-02 |
| <b>fSADratio_Emphys_RLL</b>       | 0.603  | 1.04E-51 | -0.070 | 1.16E-01 | 0.159  | 3.20E-04 | -0.005 | 9.11E-01 | 0.531  | 2.69E-38 | -0.342 | 2.17E-15 | -0.165 | 1.77E-04 |
| <b>fSADratio_Emphys_LUL</b>       | 0.668  | 5.22E-67 | -0.030 | 5.00E-01 | 0.206  | 2.72E-06 | 0.051  | 2.52E-01 | 0.418  | 5.38E-23 | -0.344 | 1.36E-15 | -0.108 | 1.47E-02 |
| <b>fSADratio_Emphys_LLL</b>       | 0.614  | 4.53E-54 | -0.050 | 2.64E-01 | 0.196  | 8.44E-06 | 0.024  | 5.94E-01 | 0.500  | 1.54E-33 | -0.318 | 2.16E-13 | -0.138 | 1.83E-03 |
| <b>airtratio_AirT_Total</b>       | 0.725  | 9.25E-84 | -0.054 | 2.26E-01 | 0.144  | 1.17E-03 | 0.076  | 8.98E-02 | 0.557  | 1.26E-42 | -0.429 | 4.12E-24 | -0.118 | 7.66E-03 |
| <b>airtratio_AirT_RUL</b>         | 0.673  | 5.63E-68 | -0.015 | 7.45E-01 | 0.120  | 7.01E-03 | 0.116  | 9.26E-03 | 0.544  | 2.58E-40 | -0.402 | 5.12E-21 | -0.122 | 5.93E-03 |
| <b>airtratio_AirT_RML</b>         | 0.678  | 4.08E-69 | -0.098 | 2.77E-02 | 0.118  | 8.15E-03 | 0.002  | 9.71E-01 | 0.362  | 4.11E-17 | -0.411 | 5.32E-22 | -0.105 | 1.77E-02 |
| <b>airtratio_AirT_RLL</b>         | 0.650  | 7.09E-62 | -0.091 | 4.10E-02 | 0.133  | 2.68E-03 | 0.014  | 7.62E-01 | 0.562  | 2.82E-43 | -0.401 | 6.22E-21 | -0.168 | 1.47E-04 |
| <b>airtratio_AirT_LUL</b>         | 0.695  | 2.47E-74 | -0.042 | 3.48E-01 | 0.137  | 2.04E-03 | 0.080  | 7.35E-02 | 0.492  | 2.88E-32 | -0.414 | 1.99E-22 | -0.103 | 2.07E-02 |
| <b>airtratio_AirT_LLL</b>         | 0.647  | 2.58E-61 | -0.072 | 1.07E-01 | 0.165  | 1.98E-04 | 0.033  | 4.52E-01 | 0.530  | 5.17E-38 | -0.370 | 7.82E-18 | -0.131 | 3.11E-03 |
| <b>med_J_Total</b>                | 0.488  | 2.40E-32 | 0.221  | 3.81E-07 | 0.548  | 5.47E-42 | 0.086  | 5.12E-02 | 0.666  | 9.58E-68 | 0.049  | 2.66E-01 | -0.097 | 2.74E-02 |
| <b>med_J_RUL</b>                  | 0.505  | 6.03E-35 | 0.166  | 1.49E-04 | 0.542  | 5.99E-41 | 0.072  | 1.03E-01 | 0.607  | 1.42E-53 | 0.045  | 3.02E-01 | -0.105 | 1.67E-02 |
| <b>med_J_RML</b>                  | 0.471  | 5.04E-30 | 0.197  | 6.16E-06 | 0.510  | 9.54E-36 | 0.090  | 4.03E-02 | 0.597  | 2.44E-51 | 0.051  | 2.49E-01 | -0.087 | 4.84E-02 |
| <b>med_J_RLL</b>                  | 0.423  | 6.28E-24 | 0.242  | 2.52E-08 | 0.482  | 1.72E-31 | 0.055  | 2.12E-01 | 0.675  | 2.22E-70 | 0.036  | 4.09E-01 | -0.101 | 2.17E-02 |
| <b>med_J_LUL</b>                  | 0.487  | 3.29E-32 | 0.187  | 1.80E-05 | 0.551  | 1.82E-42 | 0.069  | 1.15E-01 | 0.601  | 2.96E-52 | 0.047  | 2.83E-01 | -0.081 | 6.64E-02 |
| <b>med_J_LLL</b>                  | 0.420  | 1.35E-23 | 0.256  | 3.17E-09 | 0.513  | 2.94E-36 | 0.087  | 4.82E-02 | 0.663  | 4.40E-67 | 0.059  | 1.78E-01 | -0.097 | 2.74E-02 |
| <b>med_TLC_tissue_Total</b>       | -0.559 | 7.34E-44 | 0.356  | 6.68E-17 | 0.110  | 1.20E-02 | -0.031 | 4.76E-01 | -0.192 | 1.10E-05 | 0.672  | 2.10E-69 | -0.008 | 8.51E-01 |

|                           |        |          |        |          |        |          |        |          |        |          |        |          |        |          |
|---------------------------|--------|----------|--------|----------|--------|----------|--------|----------|--------|----------|--------|----------|--------|----------|
| <b>med_TLC_tissue_RUL</b> | -0.514 | 2.61E-36 | 0.220  | 4.31E-07 | 0.109  | 1.30E-02 | -0.110 | 1.24E-02 | -0.284 | 4.35E-11 | 0.587  | 2.91E-49 | 0.005  | 9.16E-01 |
| <b>med_TLC_tissue_RML</b> | -0.457 | 3.86E-28 | 0.320  | 8.17E-14 | 0.138  | 1.64E-03 | 0.001  | 9.91E-01 | -0.049 | 2.61E-01 | 0.539  | 2.40E-40 | -0.034 | 4.39E-01 |
| <b>med_TLC_tissue_RLL</b> | -0.489 | 1.95E-32 | 0.448  | 6.11E-27 | 0.088  | 4.59E-02 | 0.053  | 2.27E-01 | -0.132 | 2.58E-03 | 0.648  | 3.93E-63 | 0.057  | 1.97E-01 |
| <b>med_TLC_tissue_LUL</b> | -0.521 | 2.08E-37 | 0.293  | 9.88E-12 | 0.113  | 9.83E-03 | -0.053 | 2.31E-01 | -0.173 | 7.53E-05 | 0.615  | 2.92E-55 | -0.023 | 6.00E-01 |
| <b>med_TLC_tissue_LLL</b> | -0.494 | 3.17E-33 | 0.439  | 8.53E-26 | 0.080  | 6.73E-02 | 0.076  | 8.56E-02 | -0.087 | 4.85E-02 | 0.633  | 2.69E-59 | -0.011 | 8.09E-01 |
| <b>med_ADI_Total</b>      | -0.382 | 1.67E-19 | -0.134 | 2.25E-03 | -0.472 | 4.00E-30 | 0.004  | 9.30E-01 | -0.489 | 1.32E-32 | -0.087 | 4.79E-02 | 0.075  | 8.98E-02 |
| <b>med_ADI_RUL</b>        | -0.391 | 2.19E-20 | -0.089 | 4.27E-02 | -0.458 | 2.80E-28 | -0.037 | 3.95E-01 | -0.414 | 7.36E-23 | -0.074 | 9.07E-02 | 0.019  | 6.65E-01 |
| <b>med_ADI_RML</b>        | -0.379 | 3.55E-19 | -0.256 | 3.33E-09 | -0.484 | 6.97E-32 | -0.120 | 6.21E-03 | -0.503 | 1.19E-34 | -0.135 | 2.00E-03 | 0.047  | 2.81E-01 |
| <b>med_ADI_RLL</b>        | -0.332 | 7.91E-15 | -0.095 | 3.05E-02 | -0.381 | 2.42E-19 | 0.071  | 1.06E-01 | -0.456 | 5.72E-28 | -0.035 | 4.26E-01 | 0.090  | 4.12E-02 |
| <b>med_ADI_LUL</b>        | -0.340 | 1.67E-15 | -0.119 | 6.44E-03 | -0.461 | 1.31E-28 | -0.012 | 7.83E-01 | -0.430 | 8.80E-25 | -0.123 | 5.13E-03 | 0.057  | 1.91E-01 |
| <b>med_ADI_LLL</b>        | -0.297 | 5.11E-12 | -0.116 | 8.26E-03 | -0.413 | 8.84E-23 | 0.074  | 9.02E-02 | -0.436 | 1.88E-25 | -0.079 | 7.16E-02 | 0.102  | 2.01E-02 |
| <b>Dh_sRUL</b>            | -0.044 | 3.33E-01 | 0.105  | 1.91E-02 | -0.028 | 5.31E-01 | 0.162  | 3.03E-04 | -0.038 | 4.03E-01 | 0.063  | 1.62E-01 | 0.246  | 2.85E-08 |
| <b>Dh_sRML</b>            | -0.159 | 4.31E-04 | 0.109  | 1.63E-02 | -0.097 | 3.15E-02 | 0.148  | 1.02E-03 | -0.184 | 4.43E-05 | 0.106  | 1.86E-02 | 0.234  | 1.63E-07 |
| <b>Dh_sRLL</b>            | -0.195 | 1.15E-05 | 0.104  | 2.01E-02 | -0.079 | 7.67E-02 | 0.142  | 1.52E-03 | -0.154 | 5.62E-04 | 0.079  | 7.79E-02 | 0.145  | 1.15E-03 |
| <b>Dh_sLUL</b>            | -0.111 | 1.34E-02 | 0.082  | 6.76E-02 | -0.053 | 2.40E-01 | 0.062  | 1.66E-01 | -0.115 | 1.04E-02 | 0.083  | 6.31E-02 | 0.272  | 7.16E-10 |
| <b>Dh_sLLL</b>            | -0.118 | 8.35E-03 | 0.082  | 6.95E-02 | -0.110 | 1.40E-02 | 0.150  | 7.70E-04 | -0.122 | 6.63E-03 | 0.048  | 2.81E-01 | 0.248  | 2.17E-08 |
| <b>WT_sRUL</b>            | 0.153  | 6.65E-04 | 0.219  | 9.29E-07 | -0.035 | 4.33E-01 | 0.212  | 1.95E-06 | -0.064 | 1.54E-01 | 0.115  | 1.03E-02 | 0.318  | 4.28E-13 |
| <b>WT_sRML</b>            | -0.039 | 3.85E-01 | 0.209  | 3.11E-06 | -0.056 | 2.14E-01 | 0.185  | 3.94E-05 | -0.086 | 5.66E-02 | 0.130  | 4.08E-03 | 0.198  | 1.10E-05 |
| <b>WT_sRLL</b>            | -0.013 | 7.69E-01 | 0.196  | 1.07E-05 | -0.085 | 5.74E-02 | 0.205  | 3.96E-06 | -0.167 | 1.91E-04 | 0.104  | 2.08E-02 | 0.240  | 5.98E-08 |
| <b>WT_sLUL</b>            | 0.021  | 6.43E-01 | 0.190  | 1.91E-05 | -0.068 | 1.28E-01 | 0.130  | 3.55E-03 | -0.095 | 3.41E-02 | 0.118  | 8.17E-03 | 0.314  | 6.84E-13 |
| <b>WT_sLLL</b>            | 0.079  | 7.68E-02 | 0.212  | 1.93E-06 | -0.098 | 2.88E-02 | 0.205  | 3.97E-06 | -0.134 | 2.81E-03 | 0.100  | 2.52E-02 | 0.303  | 4.99E-12 |
| <b>WA_sRUL</b>            | 0.056  | 2.14E-01 | 0.163  | 2.85E-04 | 0.007  | 8.72E-01 | 0.211  | 2.19E-06 | 0.021  | 6.41E-01 | 0.062  | 1.72E-01 | 0.248  | 2.38E-08 |
| <b>WA_sRML</b>            | -0.102 | 2.48E-02 | 0.182  | 5.14E-05 | -0.087 | 5.36E-02 | 0.185  | 3.89E-05 | -0.126 | 5.33E-03 | 0.132  | 3.56E-03 | 0.232  | 2.32E-07 |
| <b>WA_sRLL</b>            | -0.116 | 9.55E-03 | 0.133  | 3.07E-03 | -0.080 | 7.32E-02 | 0.154  | 5.59E-04 | -0.138 | 2.07E-03 | 0.065  | 1.49E-01 | 0.147  | 1.03E-03 |
| <b>WA_sLUL</b>            | -0.025 | 5.75E-01 | 0.164  | 2.48E-04 | -0.056 | 2.10E-01 | 0.126  | 4.93E-03 | -0.083 | 6.52E-02 | 0.100  | 2.62E-02 | 0.301  | 6.42E-12 |
| <b>WA_sLLL</b>            | -0.009 | 8.34E-01 | 0.168  | 1.72E-04 | -0.089 | 4.64E-02 | 0.224  | 4.48E-07 | -0.115 | 1.03E-02 | 0.077  | 8.70E-02 | 0.302  | 6.29E-12 |
| <b>Cr_sRUL</b>            | -0.100 | 2.58E-02 | -0.072 | 1.11E-01 | -0.105 | 1.98E-02 | -0.165 | 2.39E-04 | -0.190 | 2.12E-05 | 0.101  | 2.46E-02 | -0.009 | 8.36E-01 |
| <b>Cr_sRML</b>            | -0.059 | 1.90E-01 | -0.021 | 6.36E-01 | -0.051 | 2.60E-01 | -0.028 | 5.43E-01 | -0.129 | 4.25E-03 | 0.053  | 2.39E-01 | -0.018 | 6.87E-01 |
| <b>Cr_sRLL</b>            | -0.076 | 9.09E-02 | -0.061 | 1.76E-01 | -0.035 | 4.42E-01 | -0.018 | 6.96E-01 | -0.089 | 4.65E-02 | 0.068  | 1.28E-01 | 0.066  | 1.41E-01 |
| <b>Cr_sLUL</b>            | -0.127 | 4.64E-03 | -0.048 | 2.90E-01 | -0.018 | 6.96E-01 | -0.094 | 3.63E-02 | -0.186 | 2.93E-05 | 0.141  | 1.58E-03 | 0.078  | 8.29E-02 |
| <b>Cr_sLLL</b>            | -0.050 | 2.64E-01 | -0.093 | 3.86E-02 | -0.138 | 2.07E-03 | -0.156 | 4.83E-04 | -0.146 | 1.14E-03 | -0.014 | 7.50E-01 | -0.033 | 4.62E-01 |

**Table E 11.** Descriptions of the variables listed in **Table E 10.**

| <b>Name</b>                 | <b>Description</b>                                                                                  |
|-----------------------------|-----------------------------------------------------------------------------------------------------|
| ADVAIR                      | RMU04A8 Inhaled steroids used in last 3 months: Advair (fluticasone/salmeterol)                     |
| AEROBID                     | RMU04A4 Inhaled steroids used in last 3 months: AeroBid (bunisolide)                                |
| AGE_DERV_01                 | Age                                                                                                 |
| ALBUTEROL                   | RMU05A1 Inhaled bronchodilators used in last 3 months: Albuterol (Proventil, Ventolin, ProAir)      |
| ALBUTEROL_NEB               | RMU06A4 nebulized bronchodilators used in last 3 months: albuterol (Proventil, Ventolin, ProAir)    |
| ALBUTEROLIPRATROPIUMBROMIDE | RMU06A3 nebulized bronchodilators used in last 3 months: albuterol and ipratropium bromide (DuoNeb) |
| APNEA_DIAGNOSED01           | Sleep apnea diagnosed by a health professional reported at baseline                                 |
| ARFORMOTEROL                | RMU06A2 nebulized bronchodilators used in last 3 months: arformoterol (Brovana)                     |
| AZMACORT                    | RMU04A1 Inhaled steroids used in last 3 months: Azmacort (triamcinolone)                            |
| BMH08B                      | BMH08B Coronary artery disease                                                                      |
| BMH08D                      | BMH08D Heart attack                                                                                 |
| BMH08H                      | BMH08H Congestive heart failure                                                                     |
| BMH13A                      | BMH13A Diabetes                                                                                     |
| BMI_CM01                    | BMI (from metric units) (ANT04) at baseline                                                         |
| BUDESONIDEFORMOTEROL        | RMU05A14 Inhaled bronchodilators used in last 3 months: budesonide/formoterol (Symbicort)           |

|                       |                                                                                                                       |
|-----------------------|-----------------------------------------------------------------------------------------------------------------------|
| CB_DIAGNOSED01        | Chronic bronchitis diagnosed by a health professional reported at baseline (Yes=1, No=0, Unknowns treated as missing) |
| CB_VISIT1             | Chronic Bronchitis identified at baseline                                                                             |
| CBC_BASOPHIL_PCT01    | CBC basophil PCT at baseline                                                                                          |
| CBC_EOSINOPHIL_PCT01  | CBC eosinophil PCT at baseline                                                                                        |
| CBC_LYMPHOCYTE_PCT01  | CBC lymphocyte PCT at baseline                                                                                        |
| CBC_MONOCYTE_PCT01    | CBC monocyte PCT at baseline                                                                                          |
| CBC_NEUTROPHIL_PCT01  | CBC Neutrophil PCT at baseline                                                                                        |
| CBC07_DERV            | CBC07 Red blood cell distribution width                                                                               |
| CBC08_DERV            | CBC08 Total white blood cell count                                                                                    |
| COPD_DIAGNOSED01      | COPD diagnosed by a health professional reported at baseline                                                          |
| COPDSCORE0101         | Baseline COPD assessment score                                                                                        |
| EMPHYSEMA_DIAGNOSED01 | Emphysema diagnosed by a health professional reported at baseline                                                     |
| ETHNICITY             | Ethnicity (1=Hispanic,0=Non-hispanic) (DEM05 or DEM05a)                                                               |
| FLOVENT               | RMU04A5 Inhaled steroids used in last 3 months: Flovent (fluticasone)                                                 |
| FLUTICASONESALMETEROL | RMU05A13 Inhaled bronchodilators used in last 3 months: fluticasone/salmeterol (Advair Diskus)                        |
| FORMOTEROL            | RMU05A5 Inhaled bronchodilators used in last 3 months: formoterol (Foradil)                                           |
| FORMOTEROL_NEB        | RMU06A1 nebulized bronchodilators used in last 3 months: formoterol (Perforomist)                                     |



|                                |                                                                                                          |
|--------------------------------|----------------------------------------------------------------------------------------------------------|
| GENDER                         | Gender (1=Male,2=Female) (IEC04)                                                                         |
| IPRATBROMIALBUTSULFA           | RMU05A3 Inhaled bronchodilators used in last 3 months: ipratropium bromide/albuterol sulfate (Combivent) |
| IPRATROPIUMBROMIDE             | RMU05A2 Inhaled bronchodilators used in last 3 months: ipratropium bromide (Atrovent)                    |
| IPRATROPIUMBROMIDE_NEB         | RMU06A5 nebulized bronchodilators used in last 3 months: ipratropium bromide (Atrovent)                  |
| LEVALBUTEROL                   | RMU05A10 Inhaled bronchodilators used in last 3 months: levalbuterol (Tomalate)                          |
| METAPROTERENOL                 | RMU05A9 Inhaled bronchodilators used in last 3 months: Metaproterenol (Alupent, Metaprel)                |
| OTHERSTEROIDS                  | RMU04A10 Inhaled steroids used in last 3 months: Other                                                   |
| PEX_SEVERE                     | total count of exacerbations requiring ED visit or hospitalization since entering the study              |
| PEX_TOT                        | total count of exacerbations since entering the study                                                    |
| PEX_TOT0101                    | Total Exacerbations for baseline                                                                         |
| PIRBUTEROL                     | RMU05A8 Inhaled bronchodilators used in last 3 months: Pirbuterol (Maxair)                               |
| PULMICORT                      | RMU04A6 Inhaled steroids used in last 3 months: Pulmicort (budesonide)                                   |
| PULMONARY_VASCULAR_CONDITION01 | History of Pulmonary/vascular condition at baseline                                                      |
| QVAR                           | RMU04A7 Inhaled steroids used in last 3 months: Qvar (beclomethasone)                                    |
| RDS08                          | RDS08 Wheezing/ whistling in chest                                                                       |
| RDS12                          | RDS12 Shortness of breath during sleep                                                                   |
| RDS16                          | RDS16 Asthma                                                                                             |

|                            |                                                                                     |
|----------------------------|-------------------------------------------------------------------------------------|
| RDS25A3                    | RDS25A3 Father had COPD                                                             |
| RDS25B3                    | RDS25B3 Mother had COPD                                                             |
| RMU09A1                    | RMU09A1 beta blocker used in last 3 months: Atenolol (tenormin, tenoretic)          |
| RMU09A10                   | RMU09A10 beta blocker used in last 3 months: Other                                  |
| RMU09A2                    | RMU09A2 beta blocker used in last 3 months: Metoprolol (lopresor, toprol)           |
| RMU09A3                    | RMU09A3 beta blocker used in last 3 months: Carvedilol (coreg)                      |
| RMU09A5                    | RMU09A5 beta blocker used in last 3 months: Propranolol (Inderal, Inderide)         |
| RMU09A6                    | RMU09A6 beta blocker used in last 3 months: Sotalol (Betapace, Sorine)              |
| RMU09A7                    | RMU09A7 beta blocker used in last 3 months: Timolol (Blocadren, timolide)           |
| RMU09A8                    | RMU09A8 beta blocker used in last 3 months: bisoprolol (zebeta, ziac)               |
| RMU09A9                    | RMU09A9 beta blocker used in last 3 months: pindolol (visken)                       |
| RMU11                      | RMU11 Aspirin usage                                                                 |
| SALMETEROL                 | RMU05A7 Inhaled bronchodilators used in last 3 months: Salmeterol (Serevent Diskus) |
| SIX_MINUTE_WALK_DISTANCE01 | Six Minute Walk Distance (m) (from SMW08a,b,c at BASELINE)                          |
| SMOKING_PACK_YEARS01       | Smoking pack-years at baseline                                                      |
| SMW_DSAT01                 | Oxygen desaturation with the six minute walk                                        |
| SYMBICORT                  | RMU04A9 Inhaled steroids used in last 3 months: Symbicort                           |

|             |                                                                             |
|-------------|-----------------------------------------------------------------------------|
| TIOTROPIUM  | RMU05A6 Inhaled bronchodilators used in last 3 months: tiotropium (Spiriva) |
| V1_MMP3     | Matrix metalloproteinase 3 (stromelysin 1, progelatinase) (MMP3)            |
| WHEEZINGAGE | RDS08A Age of first wheezing/whistling in chest                             |
| Dh          | Hydraulic luminal diameter                                                  |
| Cr          | Airway luminal circularity                                                  |
| WT          | Airway wall thickness                                                       |
| WA          | Airway wall area                                                            |
| sLLL        | Subgrouped left lower lobe with branches of LB6, and LB8 to LB10            |
| sLUL        | Subgrouped left upper lobe with branches of LB1 to LB5                      |
| sRLL        | Subgrouped right lower lobe with branches of RB6 to RB10                    |
| sRML        | Subgrouped right middle lobe with branches of RB4 to RB5                    |
| sRUL        | Subgrouped right upper lobe with branches of RB1 to RB3                     |
| LLL         | Left lower lobe                                                             |
| LUL         | Left upper lobe                                                             |
| RLL         | Right lower lobe                                                            |
| RML         | Right middle lobe                                                           |
| RUL         | Right upper lobe                                                            |

|                |                                            |
|----------------|--------------------------------------------|
| Emphysratio    | Emphysema percentage                       |
| fSADratio      | Functional small airway disease percentage |
| airtrapratio   | Air-trapping percentage                    |
| med_J          | Median Jacobian value                      |
| med_TLC_tissue | Median tissue value                        |
| med_ADI        | Median Anisotropic Deformation Index value |

**Table E 12.** Indexes of Effect size used in this study and their values for small, medium, and large effects by Cohen's criteria.

|                        | <b>Small</b> | <b>Medium</b> | <b>Large</b> |
|------------------------|--------------|---------------|--------------|
| <b>Cohen's d</b>       | 0.20         | 0.50          | 0.80         |
| <b>Hedge's g</b>       | 0.20         | 0.50          | 0.80         |
| <b>Correlation (r)</b> | 0.10         | 0.30          | 0.50         |

### Supplementary Reference

1. Costello, A. B. & Osborne, J. W. Best practices in exploratory factor analysis: Four recommendations for getting the most from your analysis. *Pract. Assessment, Res. Eval.* **10**, (2005).
2. Dunlap, J. W. & Thurstone, L. L. The Vectors of the Mind. *Am. J. Psychol.* **49**, 329 (1937).
3. Craig J. Galbán, Meilan K. Han, Jennifer L. Boes, Komal A. Chughtai, Charles R. Meyer, Timothy D. Johnson, Stefanie Galbán, Alnawaz Rehemtulla, Ella A. Kazerooni, Fernando J. Martinez, B. D. R. CT-based Biomarker Provides Unique Signature for Diagnosis of. *Physiol. Behav.* **176**, 139–148 (2017).
4. Choi, S., Hoffman, E. A., Wenzel, S. E., Castro, M. & Lin, C. L. Improved CT-based estimate of pulmonary gas trapping accounting for scanner and lung-volume variations in a multicenter asthmatic study. *J. Appl. Physiol.* **117**, 593–603 (2014).
5. Haghghi, B. *et al.* Imaging-based clusters in current smokers of the COPD cohort associate with clinical characteristics: The SubPopulations and Intermediate Outcome Measures in COPD Study (SPIROMICS) 11 Medical and Health Sciences 1102 Cardiorespiratory Medicine and Haemato. *Respir. Res.* **19**, (2018).
6. Yin, Y., Hoffman, E. A. & Lin, C. L. Mass preserving nonrigid registration of CT lung images using cubic B-spline. *Med. Phys.* **36**, 4213–4222 (2009).
7. Haghghi, B., D. Ellingwood, N., Yin, Y., Hoffman, E. A. & Lin, C. L. A GPU-based symmetric non-rigid image registration method in human lung. *Med. Biol. Eng. Comput.* **56**, 355–371 (2018).
8. Lynch, D. A. *et al.* CT-definable subtypes of chronic obstructive pulmonary disease: A statement of the fleischner society<sup>1</sup>. *Radiology* **277**, 192–205 (2015).
9. Smith, B. M. *et al.* Human airway branch variation and chronic obstructive pulmonary disease. *Proc. Natl. Acad. Sci. U. S. A.* **115**, E974–E981 (2018).
